# Supplementary material
Source: PubMed Central journal article supplement (PMC446188)
Supplement: 1471-2148-4-21-S2.pdf [file 1471-2148-4-21-S2.pdf]

## **Additional file 2 – Estimation of divergence time**

In the study by Donnelly et al. (2003), the mean incubation time based on 1425 cases in Hong Kong was 6.4 days and the mean time from onset of clinical symptoms to admission to a hospital was 3 – 5 days, with a longer period earlier in the epidemic [1]. The propagation time during cell culture was likely 5-7 days [2, 3]. Therefore, for those isolates without certain infection and isolate dates, we used 7 days for incubation, 5 days for admission to a hospital, and 7 days for cell culture.

### **TOR2:**

Toronto index patient 1 (or patient F) was infected and linked to index patient A on February 21, 2003 in Hong Kong [4]. TOR2 was the primary contact of patient 1. He was admitted to hospital on March 7 and died on March 13, 2003 in Toronto [5]. The specimen might be collected between March 7 and March 13, thus, it took 15 – 21 days since February 21, 2003.

### **CDC Urbani:**

The patient was the primary contact of Vietnam index patient B. He was admitted to the hospital on March 11 and died on March 29, 2003 in Bangkok [6, 7]. The specimen might be collected between March 11 and March 29, thus, it took 19 – 37 days since February 21, 2003.

### **TW1:**

The first SARS patient in Taiwan was admitted to the hospital on March 8, 2003 and the virus culture succeeded on April 19, 2003. So, the divergence time is likely to be 16 – 48 days since February 21, 2003 [8].

**Five Singaporean isolates (SIN2500, SIN2677, SIN2679, SIN2748, and SIN2774):**

SIN2500 was the primary index patient in Singapore and directly linked to index patient A in Hong Kong. SIN2677, SIN 2748, SIN2774, and SINxxxx (this patient was unavailable) were the four primary contacts and SIN2679 was the secondary contact of SINxxxx [9]. For those isolates, all patients have “history of close contact with another patient with SARS or travel to a region with documented community transmission of SARS within 10 days of onset of symptoms”, and clinical samples are “obtained from the patients between 0 and 11 days after of onset of symptoms” (see [9]). Therefore, the time for the SIN2500 was estimated to be between 7 days (mean incubation time) and 21 (10 + 11) days. Because of the close clinical relationship, we estimated the minimum incubation period 2 days [10] for SIN2677, SIN2748, SIN2774, and SINxxxx, and maximum 13 (2 + 11) days. For SIN2679, the estimated range is likewise to be 2 and 13 days from SINxxxx.

**CUHK-W1, CUHK-Su10, and HKU-39849**

Before we finished the data analysis, we did not find a formal report of the clinical relationship and sample isolation dates for these three isolates. The specimens were probably isolated before April 2, two weeks before the sequences were released in mid-April, 2003. Therefore, we used the divergence time from 12 days (7 incubation days + 5 hospital admission days) to 41 days (February 21 to April 2, 2003). Recently, we learned that CUHK-W1 was isolated on March 24, 2003 and CUHK-Su10 was isolated on March 13, 2003 (Personal Communication, The Chinese SARS Molecular Epidemiology Consortium). The dates were close to the median values of our estimates. Because the isolation dates have not been formally published, we still used our estimated range of the time.

The estimated divergence time between each pair of sequences is shown in Table S1 and S2 and the proportion of nucleotide difference is shown in Table S3.

**Table S1: Low estimate of divergence time between each pair of sequences.**

|           | TOR2 | Urbani | CUHK-W1 | CUHK-Su10 | HKU-39849 | SIN2500 | SIN2677 | SIN2679 | SIN2748 | SIN2774 |
|-----------|------|--------|---------|-----------|-----------|---------|---------|---------|---------|---------|
| TOR2      |      |        |         |           |           |         |         |         |         |         |
| Urbani    | 34   |        |         |           |           |         |         |         |         |         |
| CUHK-W1   | 27   | 31     |         |           |           |         |         |         |         |         |
| CUHK-Su10 | 27   | 31     | 24      |           |           |         |         |         |         |         |
| HKU-39849 | 27   | 31     | 24      | 24        |           |         |         |         |         |         |
| SIN2500   | 22   | 26     | 19      | 19        | 19        |         |         |         |         |         |
| SIN2677   | 24   | 28     | 21      | 21        | 21        | 16      |         |         |         |         |
| SIN2679   | 26   | 30     | 23      | 23        | 23        | 18      | 16      |         |         |         |
| SIN2748   | 24   | 28     | 21      | 21        | 21        | 16      | 14      | 16      |         |         |
| SIN2774   | 24   | 28     | 21      | 21        | 21        | 16      | 14      | 16      | 14      |         |
| TW1       | 31   | 35     | 28      | 28        | 28        | 23      | 25      | 27      | 25      | 25      |

**Table S2: High estimate of divergence time between each pair of sequences.**

|           | TOR2 | Urbani | CUHK-W1 | CUHK-Su10 | HKU-39849 | SIN2500 | SIN2677 | SIN2679 | SIN2748 | SIN2774 |
|-----------|------|--------|---------|-----------|-----------|---------|---------|---------|---------|---------|
| TOR2      |      |        |         |           |           |         |         |         |         |         |
| Urbani    | 58   |        |         |           |           |         |         |         |         |         |
| CUHK-W1   | 62   | 78     |         |           |           |         |         |         |         |         |
| CUHK-Su10 | 62   | 78     | 82      |           |           |         |         |         |         |         |
| HKU-39849 | 62   | 78     | 82      | 82        |           |         |         |         |         |         |
| SIN2500   | 42   | 58     | 62      | 62        | 62        |         |         |         |         |         |
| SIN2677   | 50   | 66     | 70      | 70        | 70        | 31      |         |         |         |         |
| SIN2679   | 59   | 75     | 79      | 79        | 79        | 40      | 49      |         |         |         |
| SIN2748   | 50   | 66     | 70      | 70        | 70        | 31      | 36      | 49      |         |         |
| SIN2774   | 50   | 66     | 70      | 70        | 70        | 31      | 36      | 49      | 36      |         |
| TW1       | 69   | 85     | 89      | 89        | 89        | 69      | 77      | 86      | 77      | 77      |

**Table S3: The proportion of nucleotide difference between each pair of sequences ( $\times 10^{-3}$ ).**

|           | TOR2 | Urbani | CUHK-W1 | CUHK-Su10 | HKU-39849 | SIN2500 | SIN2677 | SIN2679 | SIN2748 | SIN2774 |
|-----------|------|--------|---------|-----------|-----------|---------|---------|---------|---------|---------|
| TOR2      |      |        |         |           |           |         |         |         |         |         |
| Urbani    | 0.24 |        |         |           |           |         |         |         |         |         |
| CUHK-W1   | 0.37 | 0.40   |         |           |           |         |         |         |         |         |
| CUHK-Su10 | 0.17 | 0.27   | 0.34    |           |           |         |         |         |         |         |
| HKU-39849 | 0.37 | 0.47   | 0.61    | 0.40      |           |         |         |         |         |         |
| SIN2500   | 0.14 | 0.24   | 0.37    | 0.17      | 0.37      |         |         |         |         |         |
| SIN2677   | 0.17 | 0.27   | 0.40    | 0.20      | 0.40      | 0.10    |         |         |         |         |
| SIN2679   | 0.14 | 0.24   | 0.37    | 0.17      | 0.37      | 0.14    | 0.17    |         |         |         |
| SIN2748   | 0.10 | 0.20   | 0.34    | 0.14      | 0.34      | 0.03    | 0.07    | 0.10    |         |         |
| SIN2774   | 0.17 | 0.27   | 0.40    | 0.20      | 0.40      | 0.10    | 0.14    | 0.17    | 0.07    |         |
| TW1       | 0.10 | 0.20   | 0.34    | 0.14      | 0.34      | 0.10    | 0.14    | 0.10    | 0.07    | 0.14    |

## References

1. Donnelly CA, Ghani AC, Leung GM, Hedley AJ, Fraser C, Riley S, Abu-Raddad LJ, Ho L-M, Thach T-Q, Chau P: **Epidemiological determinants of spread of causal agent of severe acute respiratory syndrome in Hong Kong.** *The Lancet* 2003, **361**:1761-1766.
2. Marra MA, Jones SJ, Astell CR, Holt RA, Brooks-Wilson A, Butterfield YS, Khattri J, Asano JK, Barber SA, Chan SY, Cloutier A, Coughlin SM, Freeman D, Girn N, Griffith OL, Leach SR, Mayo M, McDonald H, Montgomery SB, Pandoh PK, Petrescu AS, Robertson AG, Schein JE, Siddiqui A, Smailus DE, Stott JM, Yang GS, Plummer F, Andonov A, Artsob H, Bastien N, Bernard K, Booth TF, Bowness D, Czub M, Drebot M, Fernando L, Flick R, Garbutt M, Gray M, Grolla A, Jones S, Feldmann H, Meyers A, Kabani A, Li Y, Normand S, Stroher U, Tipples GA, Tyler S, Vogrig R, Ward D, Watson B, Brunham RC, Kraiden M, Petric M, Skowronski DM, Upton C, Roper RL: **The Genome sequence of the SARS-associated coronavirus.** *Science* 2003, **300**:1399-1404.

3. Ksiazek TG, Erdman D, Goldsmith CS, Zaki SR, Peret T, Emery S, Tong S, Urbani C, Comer JA, Lim W, Rollin PE, Dowell SF, Ling AE, Humphrey CD, Shieh WJ, Guarner J, Paddock CD, Rota P, Fields B, DeRisi J, Yang JY, Cox N, Hughes JM, LeDuc JW, Bellini WJ, Anderson LJ: **A novel coronavirus associated with severe acute respiratory syndrome.** *N Engl J Med* 2003, **348**:1953-1966.
4. Centers for Disease Control and Prevention: **Update: Outbreak of severe acute respiratory syndrome--worldwide, 2003.** *MMWR Morb Mortal Wkly Rep* 2003, **52**:241-248.
5. Poutanen SM, Low DE, Henry B, Finkelstein S, Rose D, Green K, Tellier R, Draker R, Adachi D, Ayers M, Chan AK, Skowronski DM, Salit I, Simor AE, Slutsky AS, Doyle PW, Krajden M, Petric M, Brunham RC, McGeer AJ: **Identification of severe acute respiratory syndrome in Canada.** *N Engl J Med* 2003, **348**:1995-2005.
6. Rota PA, Oberste MS, Monroe SS, Nix WA, Campagnoli R, Icenogle JP, Penaranda S, Bankamp B, Maher K, Chen MH, Tong S, Tamin A, Lowe L, Frace M, DeRisi JL, Chen Q, Wang D, Erdman DD, Peret TC, Burns C, Ksiazek TG, Rollin PE, Sanchez A, Liffick S, Holloway B, Limor J, McCaustland K, Olsen-Rasmussen M, Fouchier R, Gunther S, Osterhaus AD, Drosten C, Pallansch MA, Anderson LJ, Bellini WJ: **Characterization of a novel coronavirus associated with severe acute respiratory syndrome.** *Science* 2003, **300**:1394-1399.
7. Savioli L: **Carlo Urbani.**  
<http://education.guardian.co.uk/higher/news/story/0,9830,940660,00.html>. *The Guardian* (April 21, 2003).
8. **National Taiwan University Hospital. SARS Research Progress.**  
<http://ntuh.mc.ntu.edu.tw/med/sars/research.htm> (accessed on May 10, 2003).

9. Ruan YJ, Wei CL, Ling AE, Vega VB, Thoreau H, Se Thoe SY, Chia J-M, Ng P, Chiu KP, Lim L: **Comparative full-length genome sequence analysis of 14 SARS coronavirus isolates and common mutations associated with putative origins of infection.** *The Lancet* 2003, **361**:1779-1785.
10. Tsang KW, Ho PL, Ooi GC, Yee WK, Wang T, Chan-Yeung M, Lam WK, Seto WH, Yam LY, Cheung TM, Wong PC, Lam B, Ip MS, Chan J, Yuen KY, Lai KN: **A cluster of cases of severe acute respiratory syndrome in Hong Kong.** *N Engl J Med* 2003, **348**:1977-1985.
